# Supplementary material
Source: PubMed Central journal article supplement (PMC3686495)

Type of file: figure

Label: Supp Figure 1

Filename: SupplementalFigure1.pdf

**Insulin**

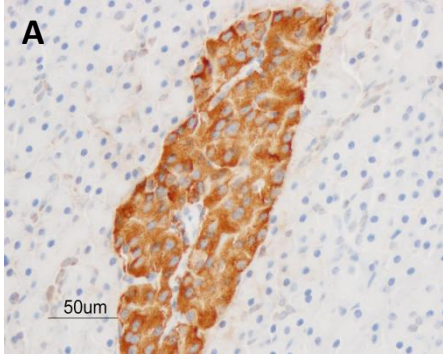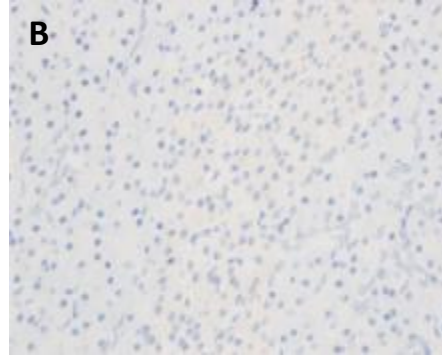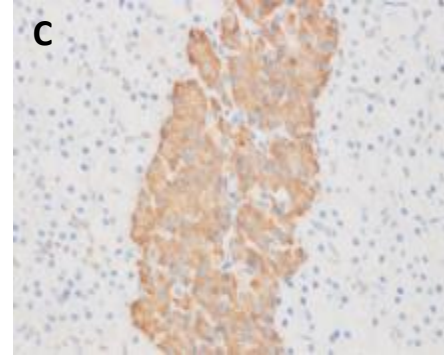

**Glucagon**

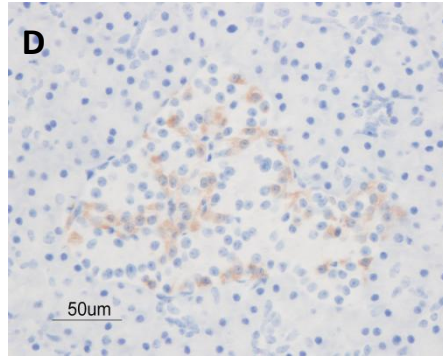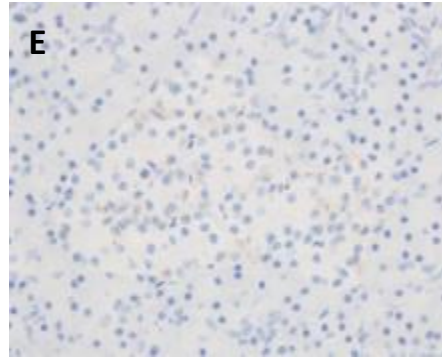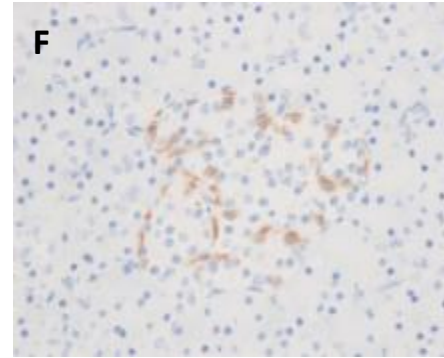

**Somatostatin**

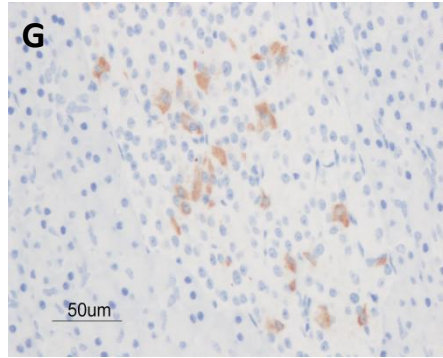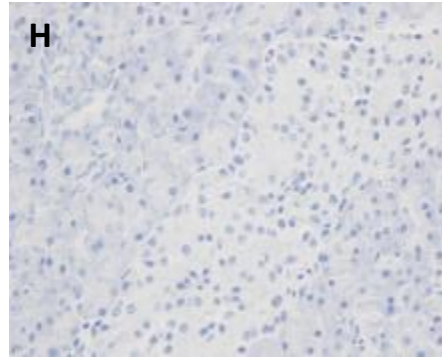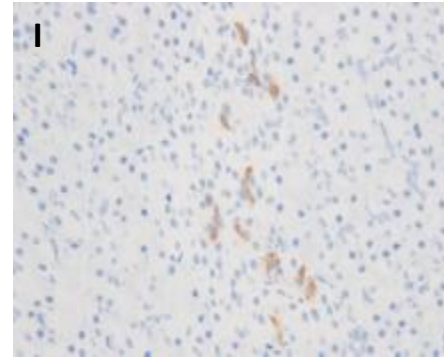

Type of file: figure

Label: Supp Figure 2

Filename: supplementalfigure2\_.5.22.2012.pdf

# Insulin

# Glucagon

# Somatostatin

125d

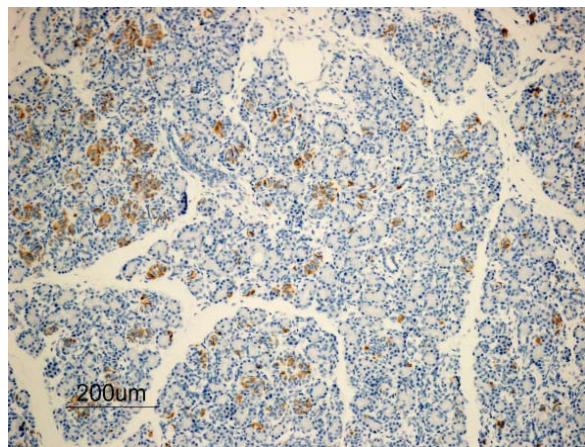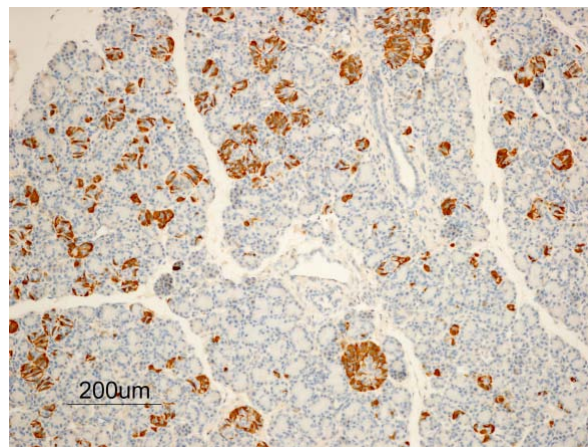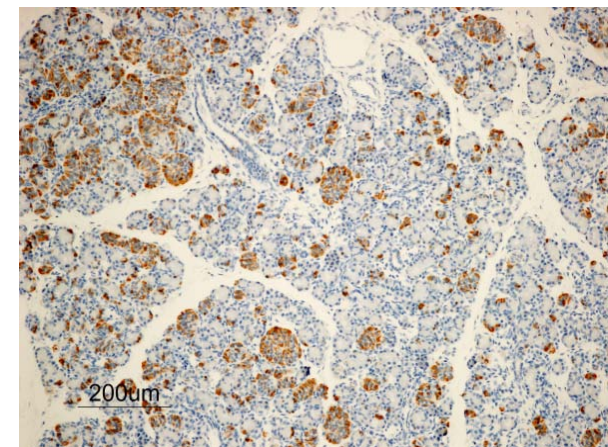

140d

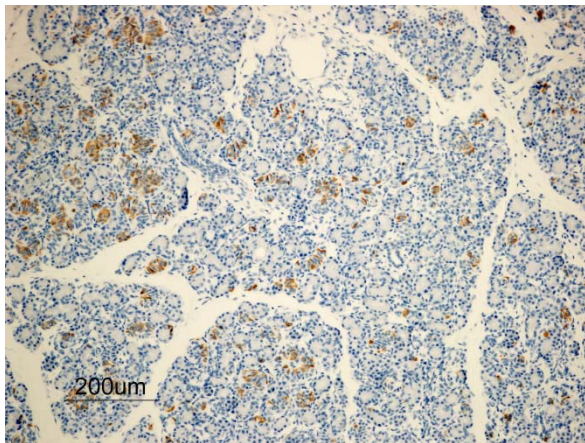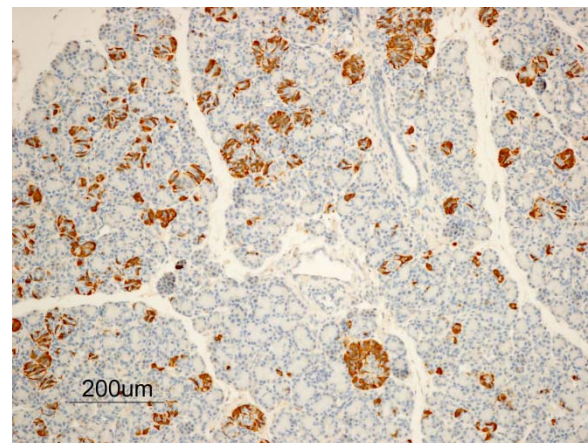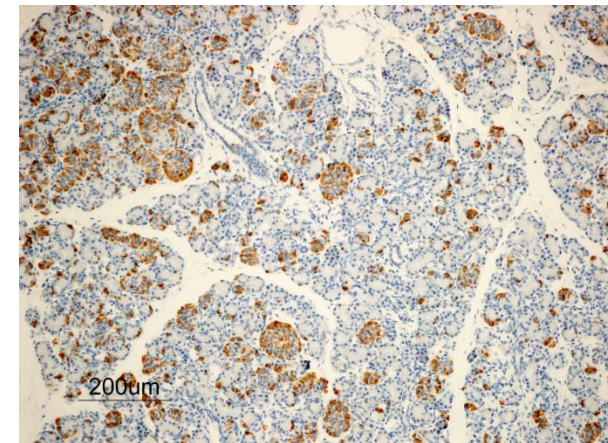

175d

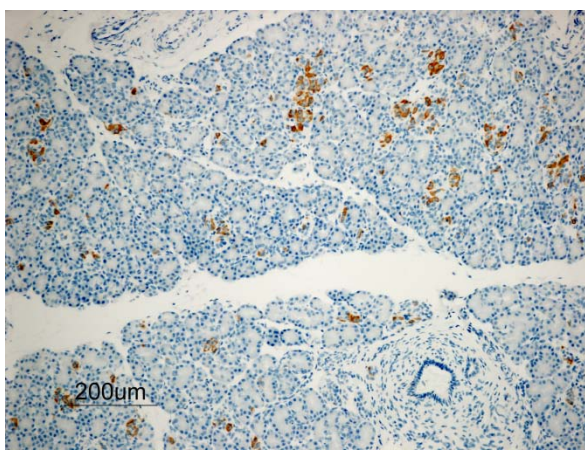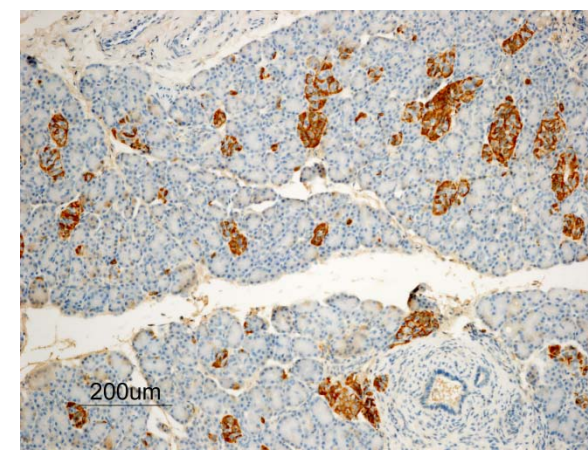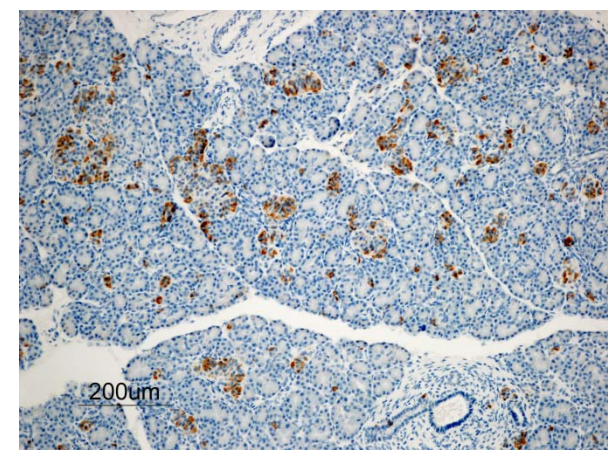

# Insulin

# Glucagon

# Somatostatin

185d

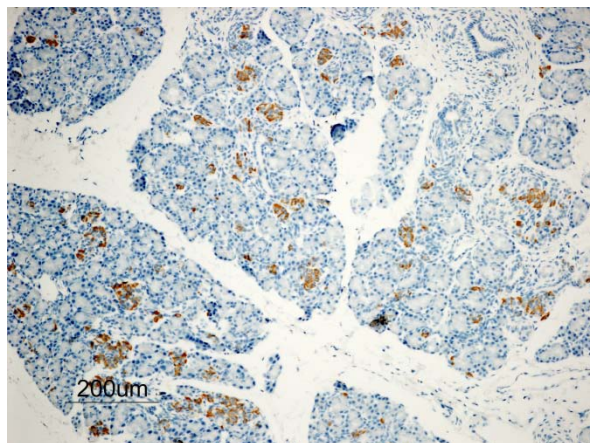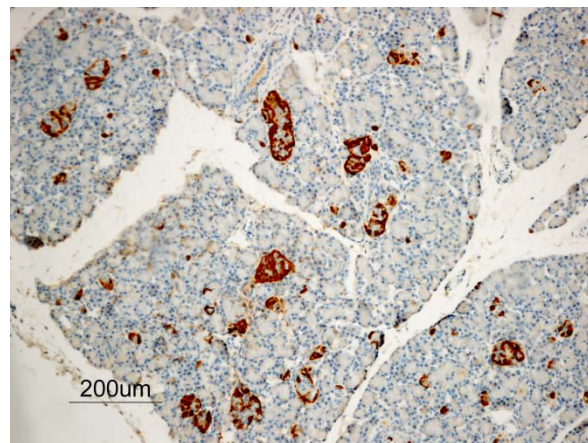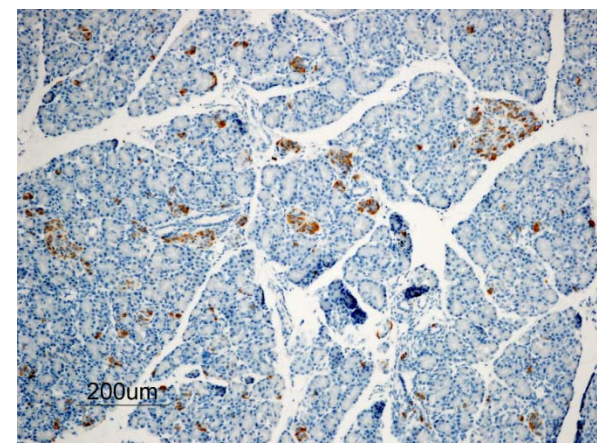

185+5d

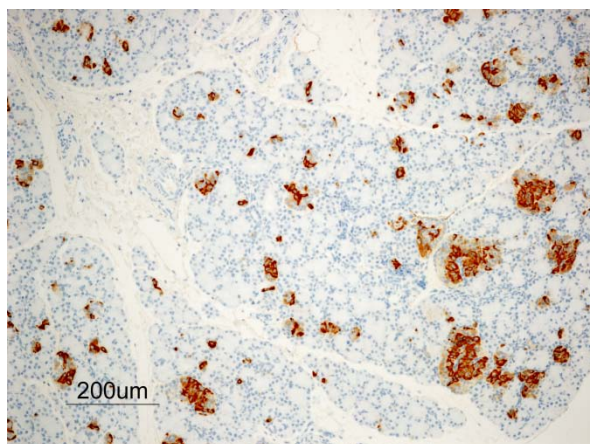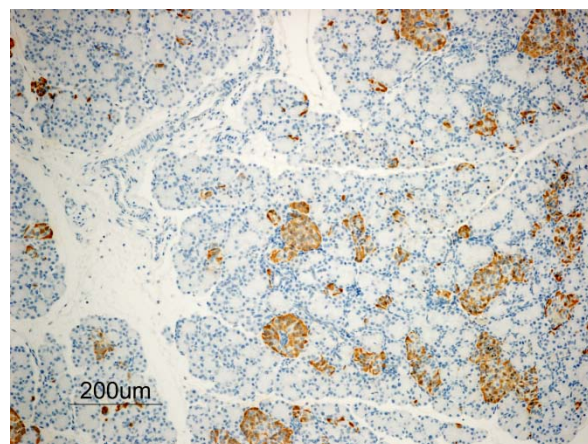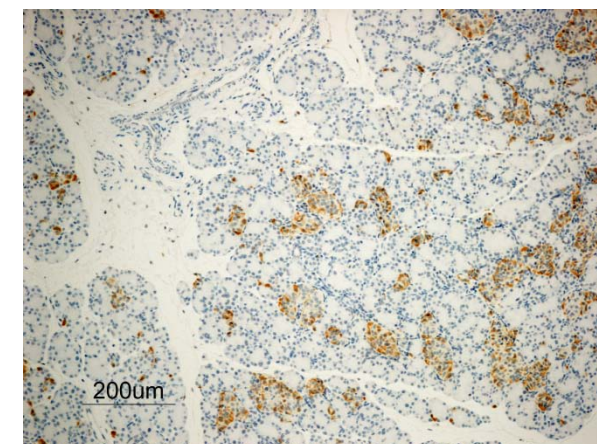

Adult

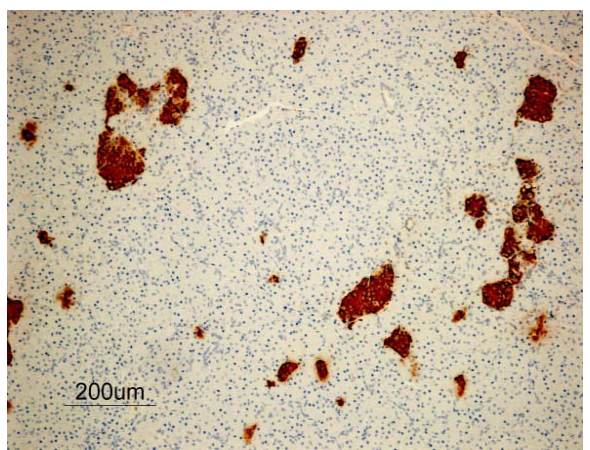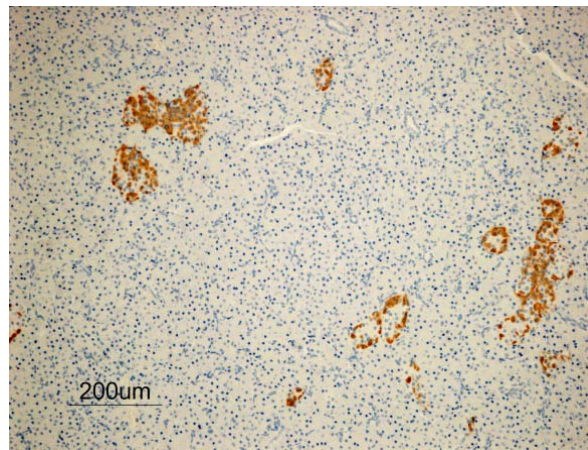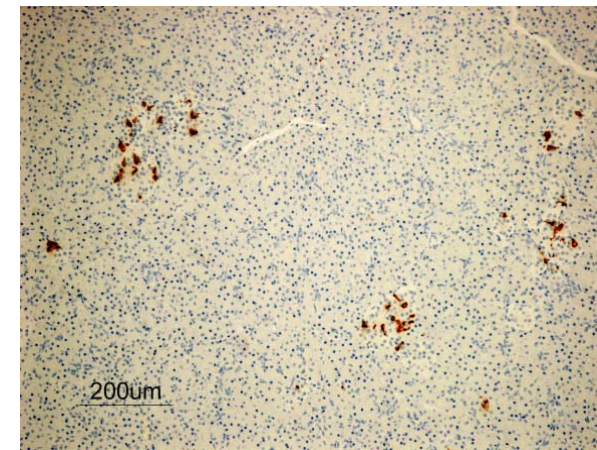

Type of file: figure

Label: Supp Figure 3

Filename: SupplementalFigure3.EM\_5.22.2012.tif

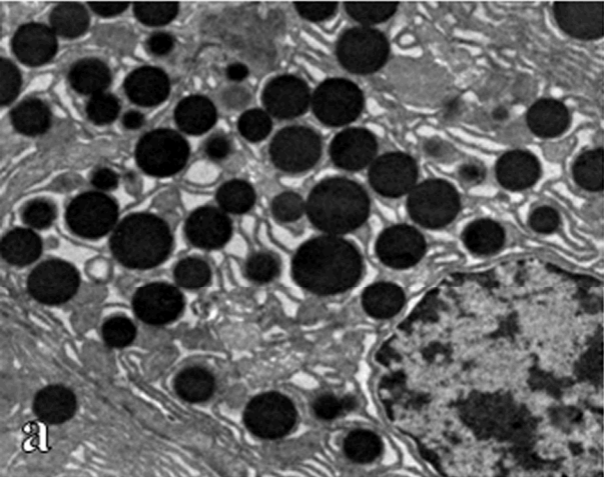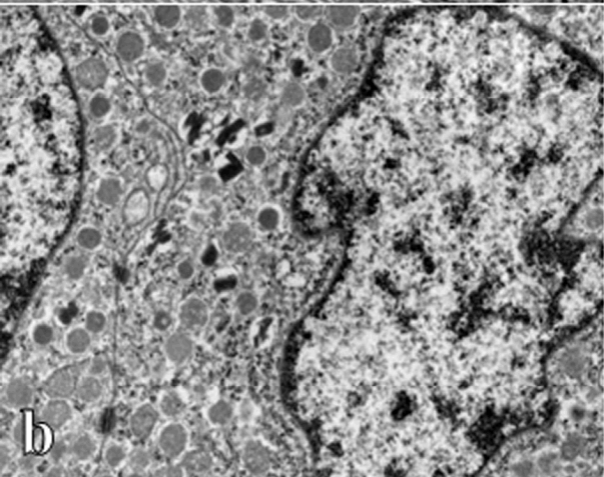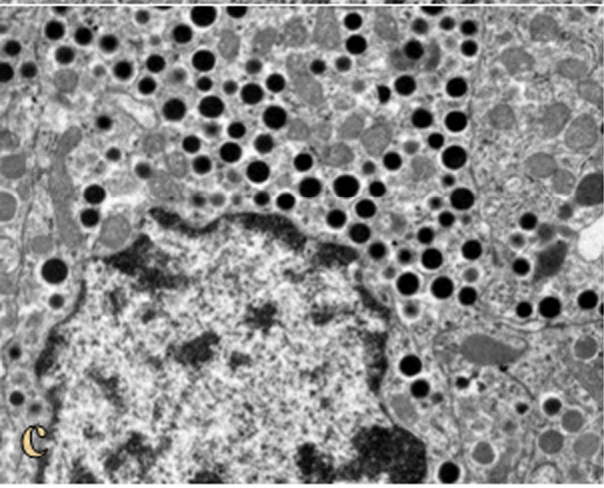

Supplement: NIHMS427379-supplement-01.pdf [file NIHMS427379-supplement-01.pdf]
